# Supplementary material for: Role of TSPO/VDAC1 Upregulation and Matrix Metalloproteinase-2 Localization in the Dysfunctional Myocardium of Hyperglycaemic Rats
Source: PubMed Central journal article supplement (PMC7587933; doi:10.3390/ijms21207432), 2020-10-09
Supplement: ijms-21-07432-s001.pdf [file ijms-21-07432-s001.pdf]

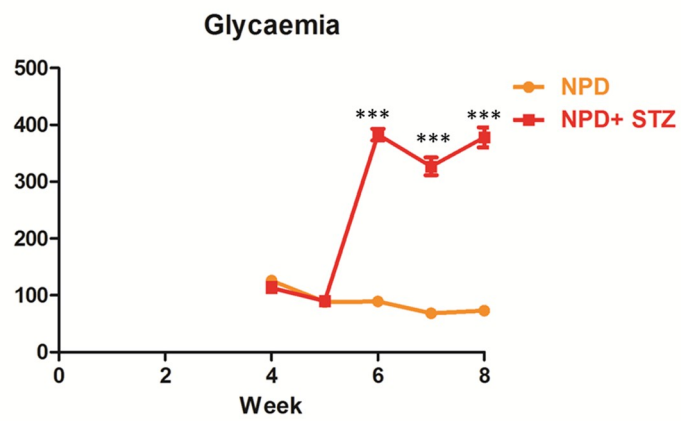

**Supplementary Figure S1.** Time course of blood glucose levels.

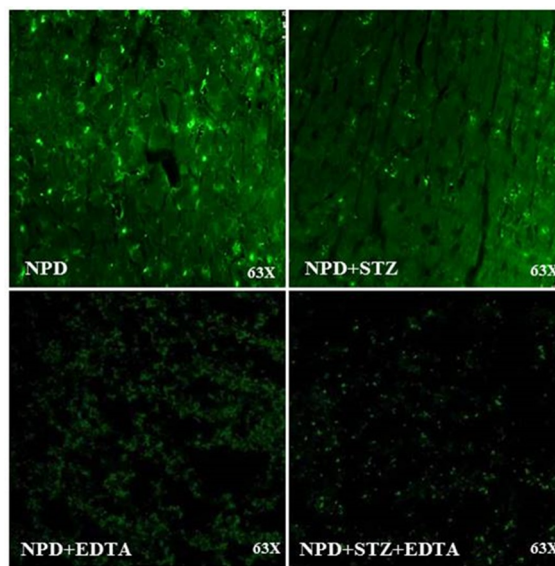

**Supplementary Figure S2.** MMP-2 gelatinolytic activity (upper panels) and MMP-2 gelatinolytic activity plus 20 mM EDTA (lower panels).
